# Supplementary material
Source: publisher site journal article supplement (https://www.dovepress.com/article/565938)
Supplement: Supplementary file 1 [file 565938%20Revised%20Supplementary%20Materials.docx]

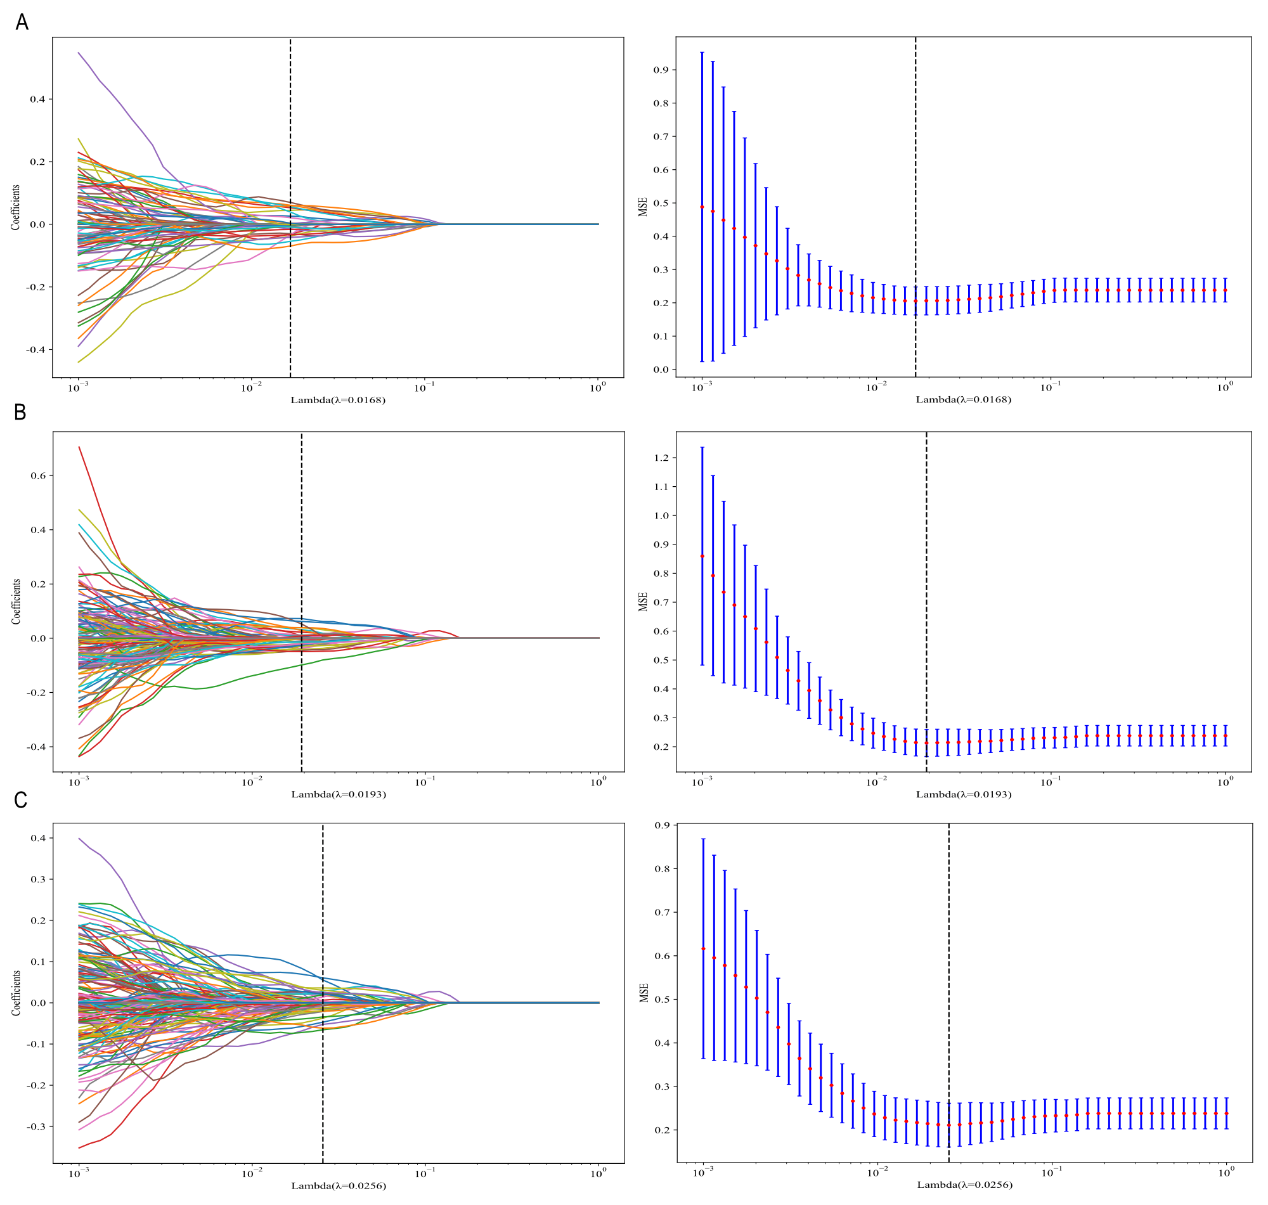


Supplement Figure 1. Radiomic feature selection based on LASSO algorithm. Ten-fold cross-validated coefficients and MSE for soft tissue RFs (A), phalanges RFs (B) and integrated RFs (C).


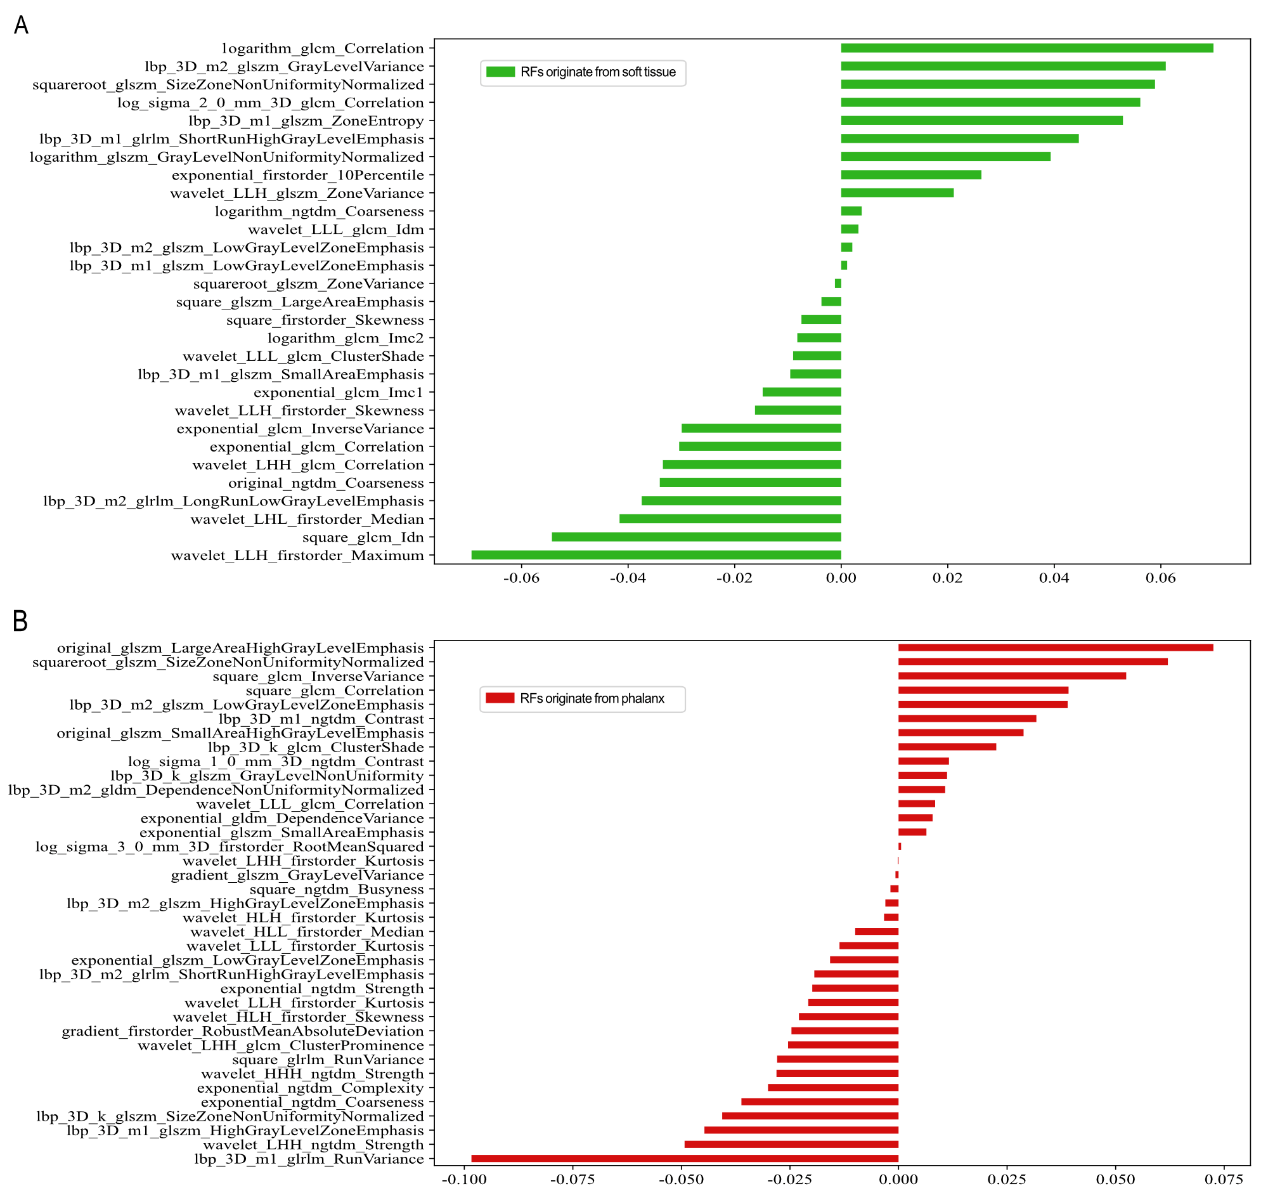


Supplement Figure 2. The histogram of the RFs importance score of the soft tissue RFs model (A) and the phalanges RFs model (B).
